# Supplementary material for: Outward conversion of core–shell nanostructured ZnS microspheres to mesoporous ZnO ones
Source: Royal Society of Chemistry journal article supplement (doi:10.1039/c3ce27110b), 2013-01-01
Supplement: c3ce27110b.pdf [file c3ce27110b.pdf]

## Supporting Information

# Outward Conversion of Core-Shell Nanostructured ZnS Microspheres to Mesoporous ZnO Ones

Xionghui Fu,<sup>a</sup> Xianfeng Yang,<sup>a</sup> Zhiren Qiu,<sup>a</sup> Fenghua Zhao,<sup>a</sup> Jianle Zhuang,<sup>a</sup> Aihua He,<sup>a</sup>  
Liqiao Chen,<sup>a</sup> Chunlei Wu,<sup>b</sup> Xianjian Duan,<sup>b</sup> Chaolun Liang<sup>a</sup> and Mingmei Wu\*<sup>a</sup>

MOE Key Laboratory of Bioinorganic and Synthetic Chemistry, State Key Laboratory of Optoelectronic Materials and Technology, Key Laboratory of Environment and Energy Chemistry of Guangdong Higher Education Institutes, School of Chemistry and Chemical Engineering, School of Physics and Engineering, Instrumental Analysis and Research Centre, Sun Yat-Sen University, Guangzhou, 510275, P. R. China. Guangzhou GBS High-Tech & Industrial Co. Ltd., NO 15, Nanxiang San Road, Science City, Luogang District, Guangzhou, 510663, P. R. China.

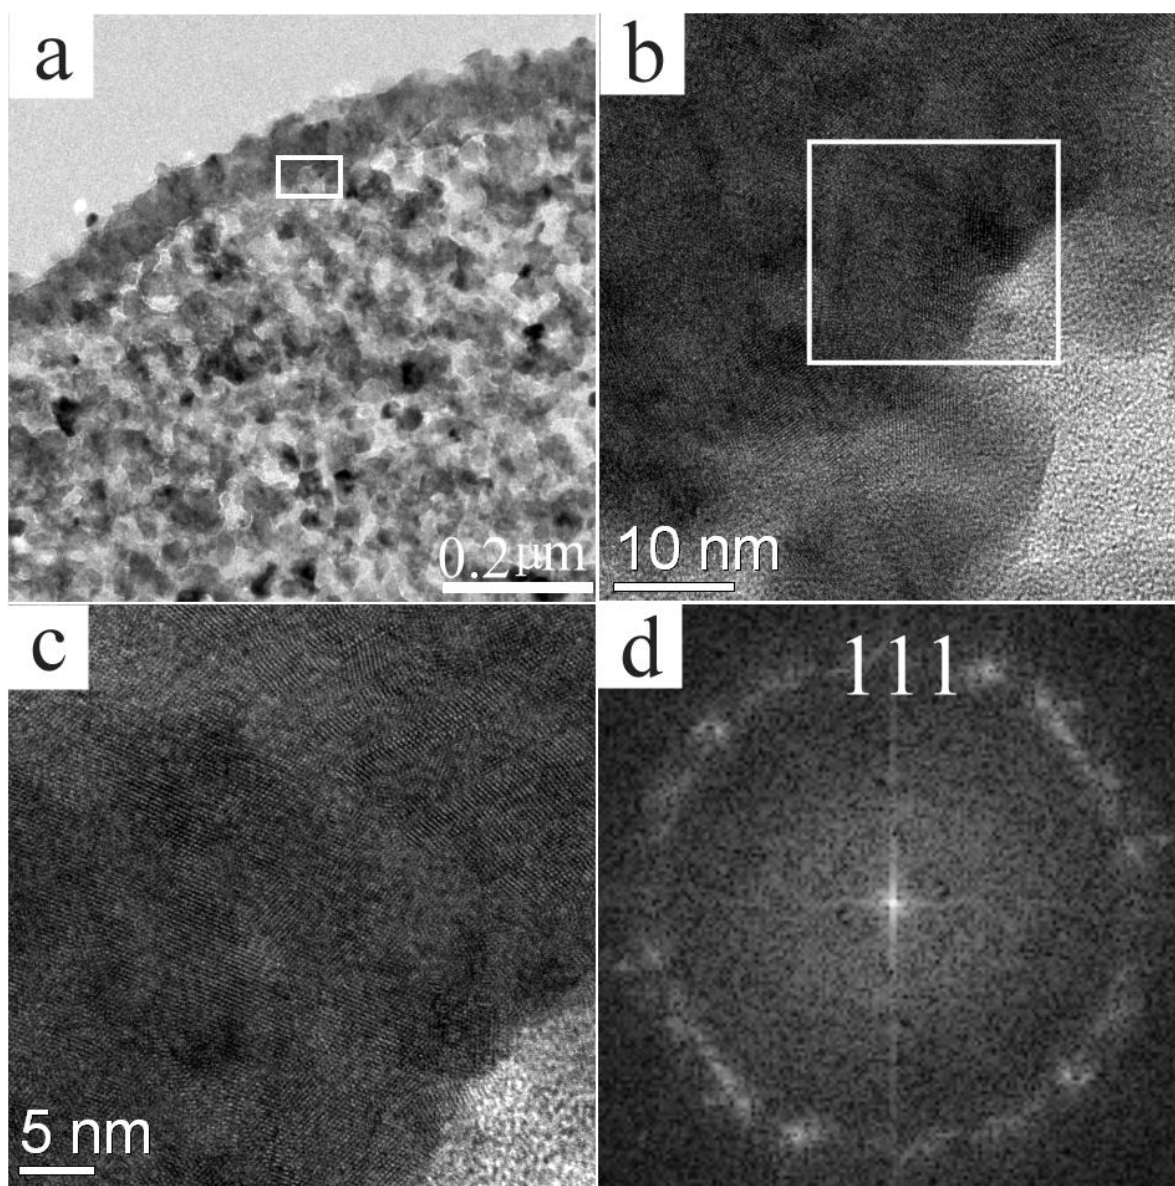

**Figure S1.** (a) A TEM image of the typical Zn(S,O)@ZnS core-shell product, (b) high-magnification TEM image from the rectangle in (a), (c) high resolution TEM image from (b) indicating rich defects, (d) corresponding FFT pattern of (c), indicating the shell is sphalerite ZnS.

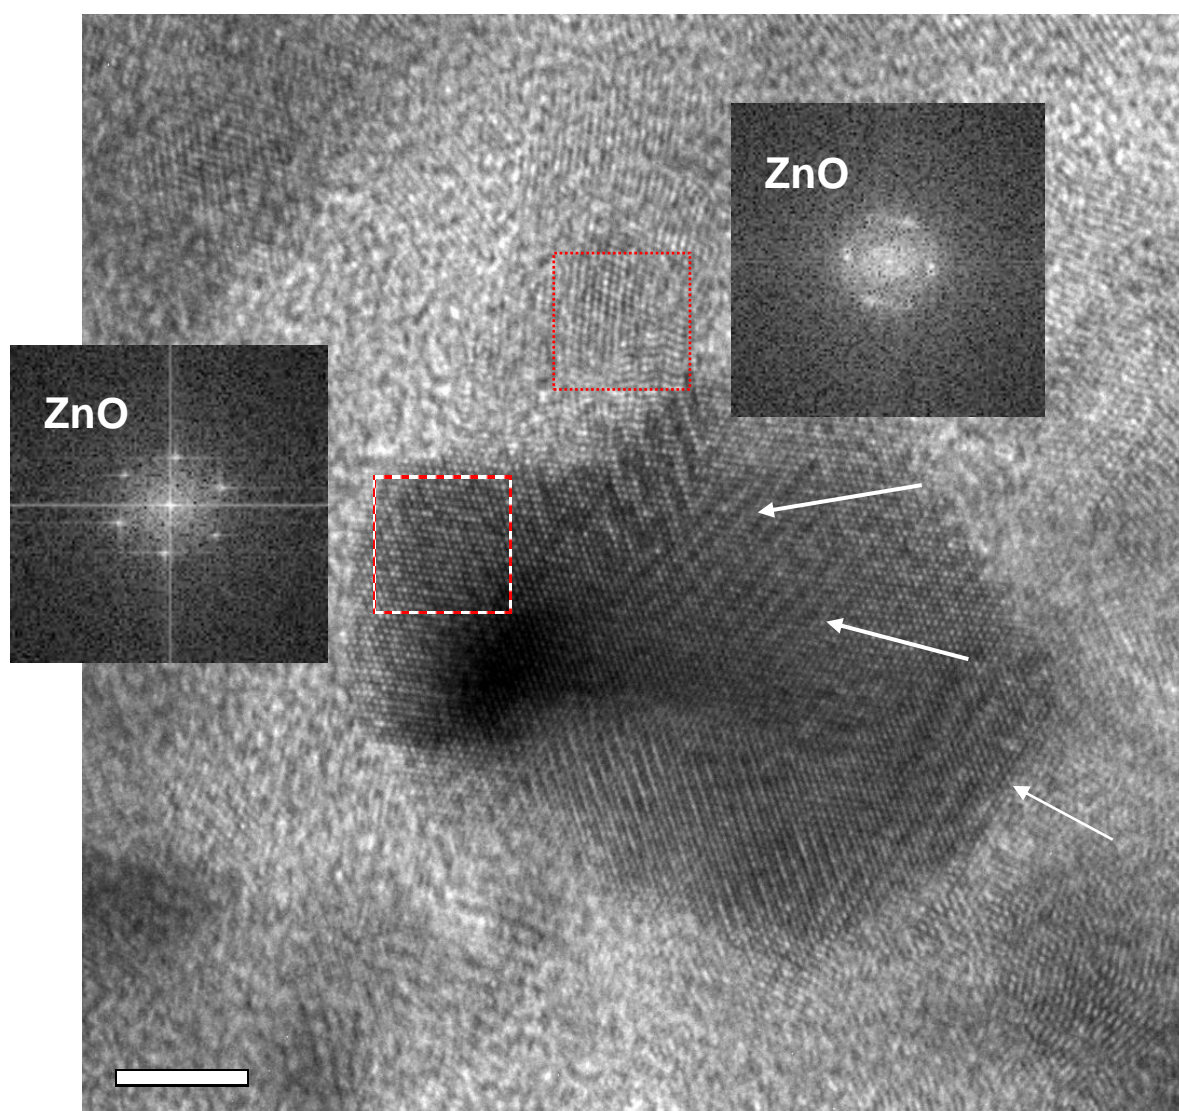

**Figure S2.** The presence of ZnO nanocrystals with size of ca. 5 nm on the surface of a nanoparticle inside the core. There are Moriefringes which might results from mismatched overlap of ZnS and ZnO lattice. The mismatch is about 10 % between ZnS (111) and ZnO (10-10).



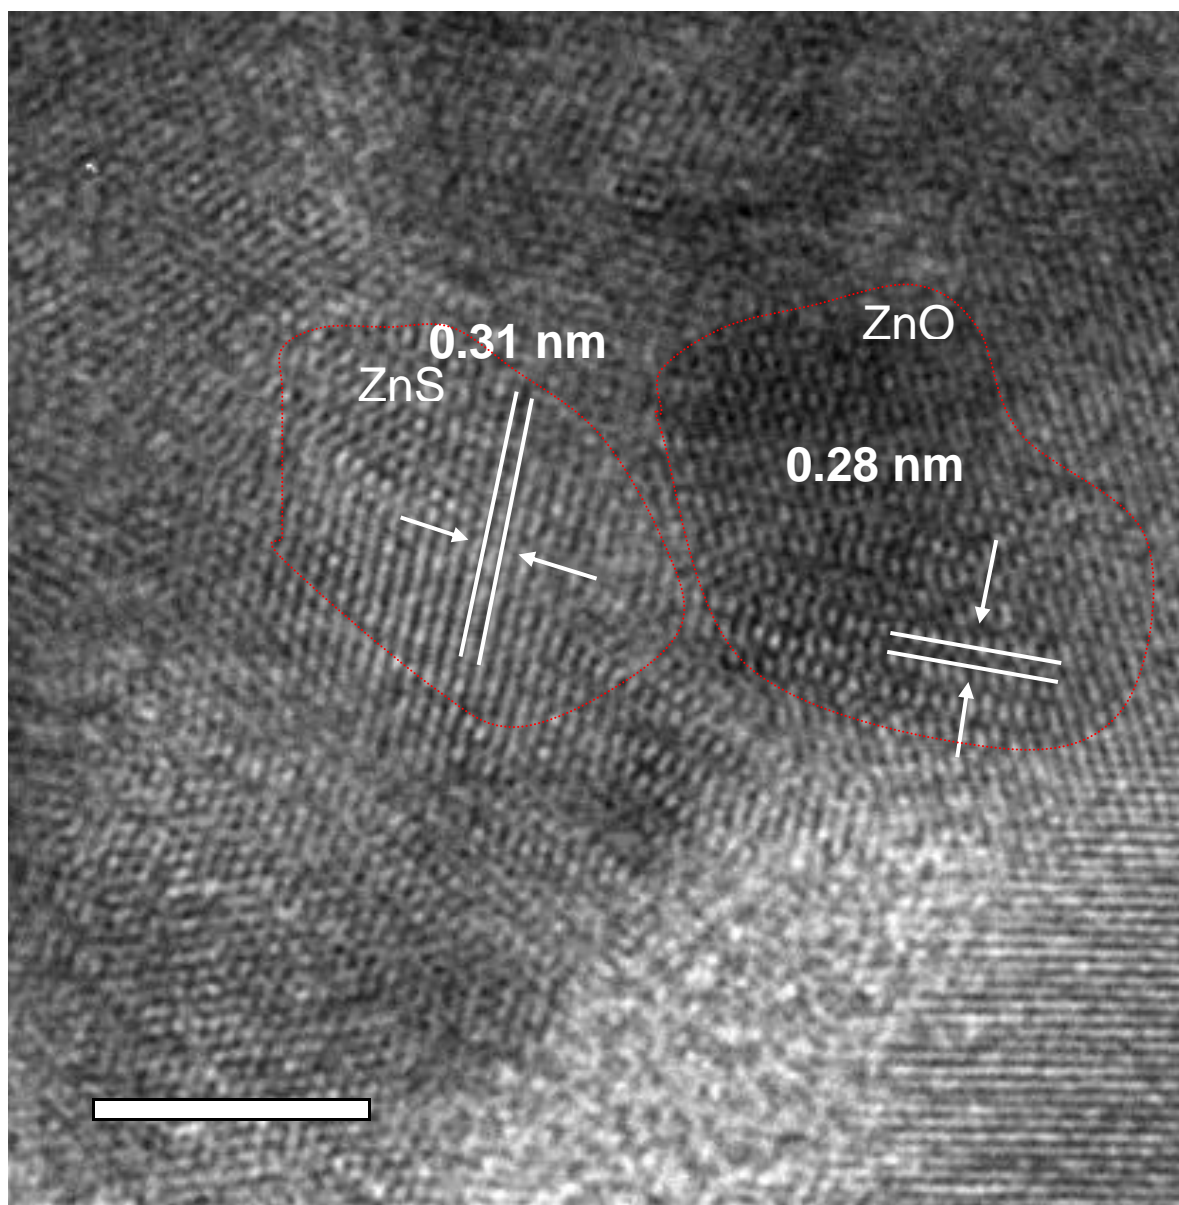

**Figure S3.** An enlarged HR-TEM image to clearly show lattice fringes of ZnS and ZnO respectively.

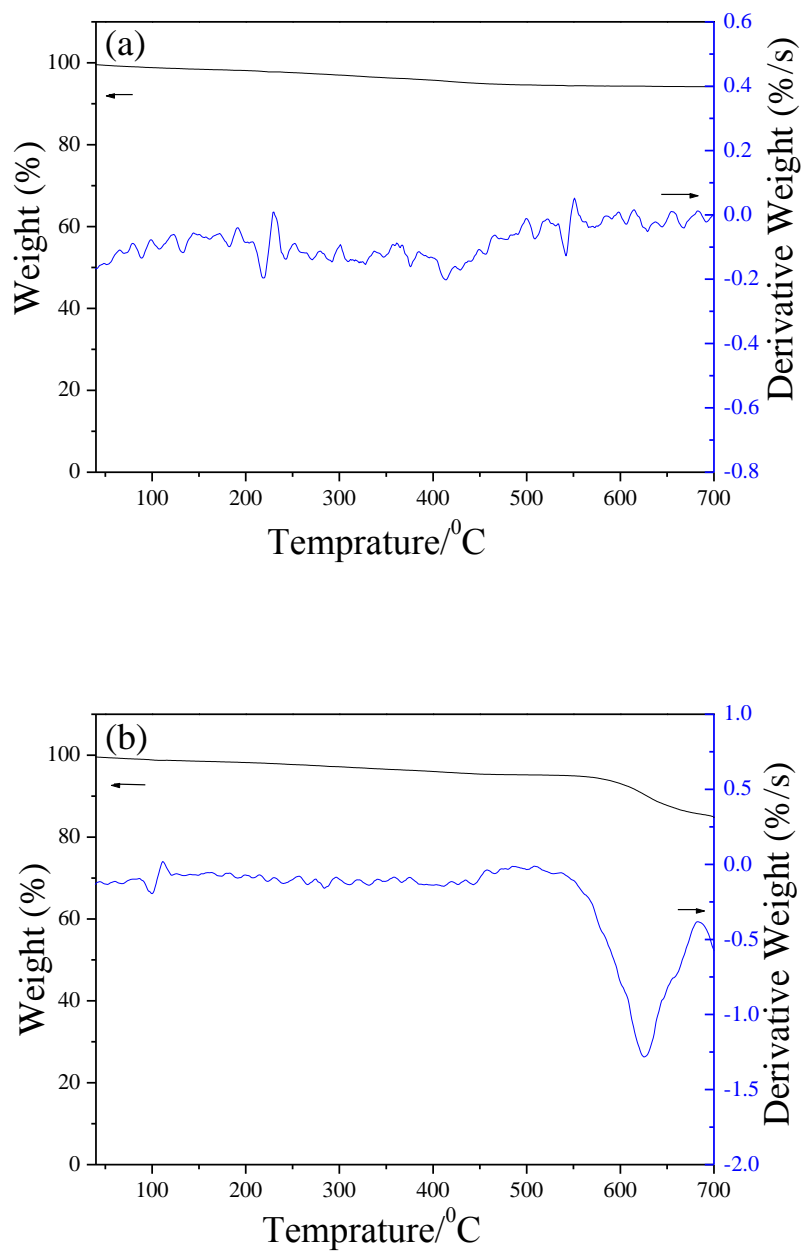

**Figure S4.** TG-DTG analyses of ZnS samples annealing under different conditions: (a) in N<sub>2</sub> flow and (b) in air flow.

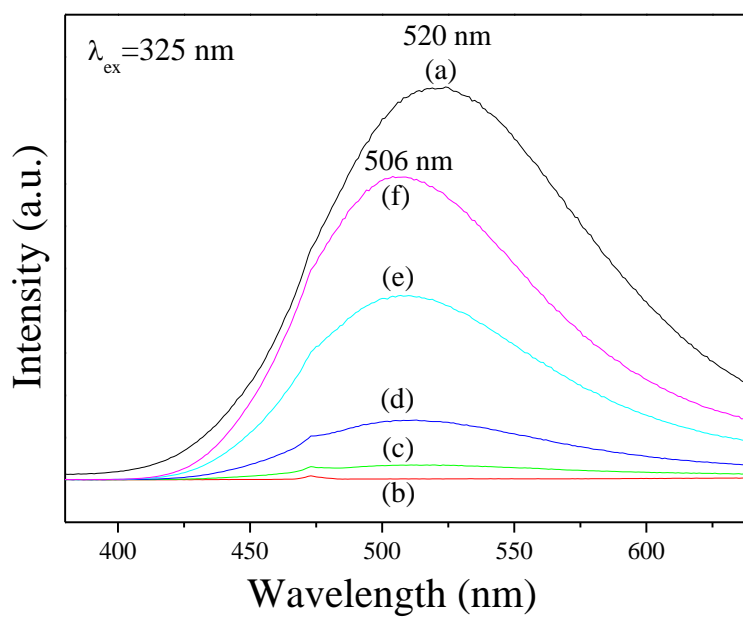

**Figure S5.** Room-temperature photoluminescence spectra of (a) the pristine ZnS sample and the products after its thermal treatment in air for (b) 1.0, (c) 4.0, (d) 8.0, (e) 12.0 hrs, and (f) 48 hrs, respectively.
